# Supplementary material for: Predictive Model for Preeclampsia Combining sFlt-1, PlGF, NT-proBNP, and Uric Acid as Biomarkers
Source: MDPI journal article supplement (doi:10.3390/jcm12020431), 2023-01-05
Supplement: s1 [file s1]

## SUPPLEMENTARY MATERIALS

### SUPPLEMENTARY METHODS

#### *Predictive models*

A random forest-based supervised machine-learning model was used to predict the risk level of PE (low, moderately low, moderately high, or high risk) of a patient with clinical suspicion. We have set that the patient will be negative if none of the patient's repeated measurements have a moderate-high risk at least. Otherwise, the patient is considered positive. True positive and true negative patients are those coincident with the final decision of the clinician.

The prediction of a random forest model is built by averaging the predictions of many randomized decision trees. A decision tree is a model that is able to derive a medical guideline for the assessment or management of a patient from the experience of some clinicians that is collected in a database. However, the model could either easily end up developing an accurate guideline though inconsistent on average, or a consistent one though inaccurate on average. A random forest is an ensemble model that involves bagging (bootstrap aggregating); it selects many bootstrap samples from the database and fits a decision tree on each, in order to make a guideline as accurate as consistent on average.

The module `sklearn.ensemble.RandomForestClassifier` of the library `sklearn`, which includes several free software machine-learning models for the Python programming language, was used.

#### **Table S1. Decision thresholds.**

| <b>Early-preterm PE</b> | sFlt-1/PIGF ratio | sFlt-1/PIGF + proBNP + urid acid |
|-------------------------|-------------------|----------------------------------|
| <b>Rule out</b>         |                   |                                  |
| Low                     | 0-16.0            | 0-15.5                           |
| Moderately low          | 16.0-38.4         | 15.5-41.5                        |
| <b>Rule in</b>          |                   |                                  |
| Moderately high         | 38.4-59.3         | 41.5-65.4                        |
| High                    | 59.3-100          | 65.4-100                         |

| <b>Late-preterm PE</b> | sFlt-1/PIGF ratio | sFlt-1/PIGF + proBNP + urid acid |
|------------------------|-------------------|----------------------------------|
| <b>Rule out</b>        |                   |                                  |
| Low                    | 0-14.4            | 0-13.2                           |
| Moderately low         | 14.4-21.6         | 13.2-33.2                        |
| <b>Rule in</b>         |                   |                                  |
| Moderately high        | 21.6-31.0         | 33.2-54.2                        |
| High                   | 31.0-100          | 54.2-100                         |

### SUPPLEMENTARY FIGURES

A)

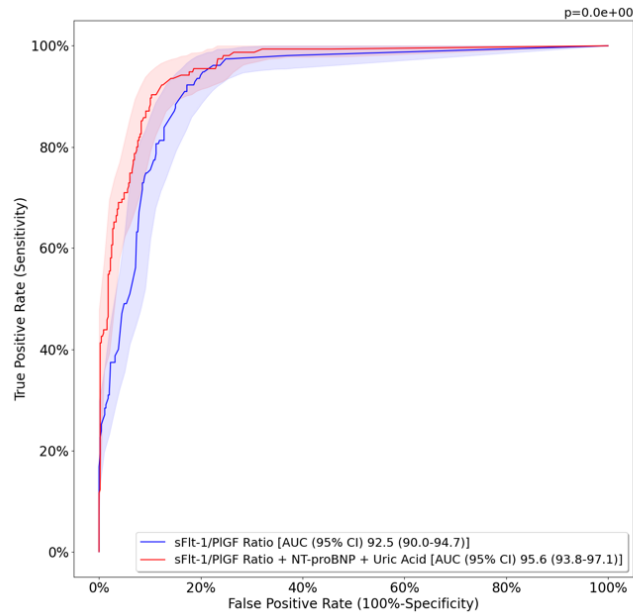

B)

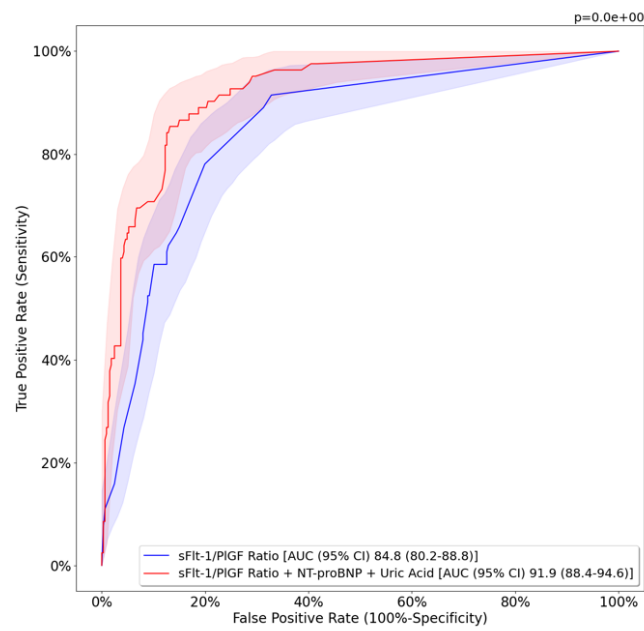

sFlt-1, soluble fms-like tyrosine kinase 1; PlGF, placental growth factor; NT-proBNP, N-terminal pro-brain natriuretic peptide; AUC, area under the curve; CI, confidence interval.

Preterm PE was defined as PE below 37<sup>+0</sup> weeks.

**Figure S1.** Performance of studied models for predicting preterm PE. **(A)** Prediction of early-preterm PE and **(B)** prediction of late-preterm PE.

A)

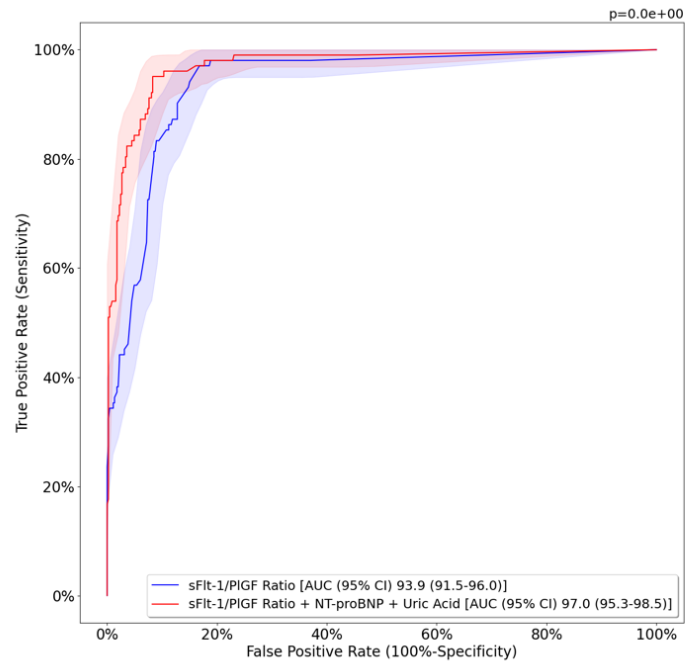

B)

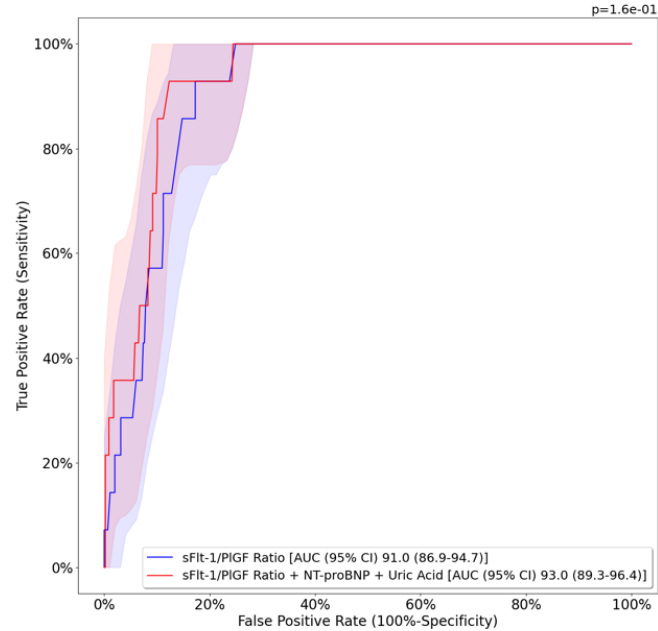

sFlt-1, soluble fms-like tyrosine kinase 1; PlGF, placental growth factor; NT-proBNP, N-terminal pro-brain natriuretic peptide; AUC, area under the curve; CI, confidence interval.

Early-preterm PE was defined as PE below 34<sup>+0</sup> weeks.

**Figure S2.** Performance of studied models for predicting early-preterm PE within 1 and 3 weeks to delivery. (A) Prediction of early-preterm PE within 1 week to delivery and (B) prediction of early-preterm PE within 3 weeks to delivery.

A)

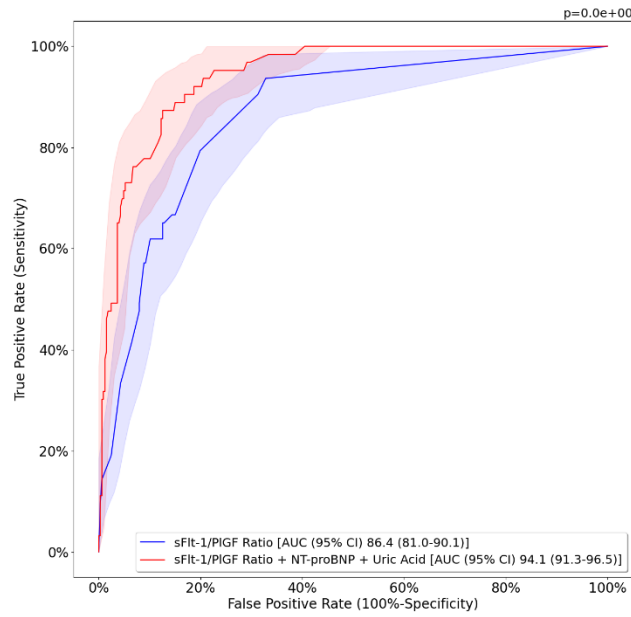

B)

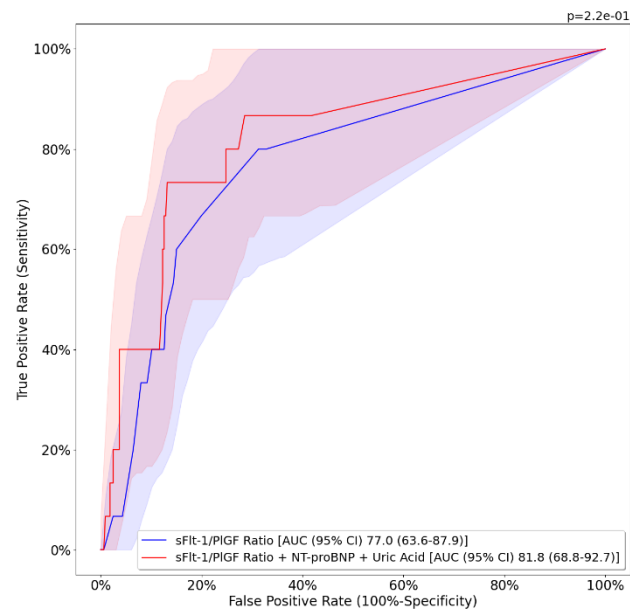

sFlt-1, soluble fms-like tyrosine kinase 1; PlGF, placental growth factor; NT-proBNP, N-terminal pro-brain natriuretic peptide; AUC, area under the curve; CI, confidence interval.

Late-preterm PE was defined as PE between 34<sup>+0</sup> and 36<sup>+6</sup> weeks.

**Figure S3.** Performance of studied models for predicting late-preterm PE within 1 and 2 weeks to delivery. (A) Prediction of late-preterm PE within 1 week to delivery and (B) prediction of late-preterm PE within 2 weeks to delivery.
